# Supplementary material for: Early use of donepezil against psychosis and cognitive decline in Parkinson’s disease: a randomised controlled trial for 2 years
Source: PubMed Central journal article supplement — J Neurol Neurosurg Psychiatry. 2018 Aug 3;89(12):1332–40. doi: 10.1136/jnnp-2018-318107 (PMC6288700; doi:10.1136/jnnp-2018-318107), 2018-08-03
Supplement: jnnp-2018-318107supp001.pdf [file jnnp-2018-318107supp001.pdf]

Supplementary table 1

**Adjusted hazard ratio in females and males**

| <b>Sex</b> | <b>Adjusted HRs ( 95% confidence interval )</b> | <b>P value</b> |
|------------|-------------------------------------------------|----------------|
| Females    | 0.82 ( 0.39 - 1.73 )                            | 0.82           |
| Males      | 0.93 ( 0.32 - 2.74 )                            | 0.90           |

Adjusted for psychosis history, mH-Y (2.5 vs 3-4), and ESS.

HR: hazard ratio.
