# Supplementary material for: Early use of donepezil against psychosis and cognitive decline in Parkinson’s disease: a randomised controlled trial for 2 years
Source: PubMed Central journal article supplement — J Neurol Neurosurg Psychiatry. 2018 Aug 3;89(12):1332–40. doi: 10.1136/jnnp-2018-318107 (PMC6288700; doi:10.1136/jnnp-2018-318107), 2018-08-03
Supplement: jnnp-2018-318107supp002.pdf [file jnnp-2018-318107supp002.pdf]

Supplementary table 2

**Secondary outcome measures in males**

|                               | Donepezil<br>means (SEM) | Placebo<br>means (SEM) | Treatment effect* |   |                         |   | <i>p</i> |
|-------------------------------|--------------------------|------------------------|-------------------|---|-------------------------|---|----------|
|                               |                          |                        | means             | ( | 95% confidence interval | ) |          |
| <b>Psychosis</b>              |                          |                        |                   |   |                         |   |          |
| Cx in total PPQ               | -0.13 (0.24)             | 0.65 (0.30)            | -0.78             | ( | -1.53 - -0.027          | ) | 0.042    |
| <b>Sleepiness</b>             |                          |                        |                   |   |                         |   |          |
| Cx in Epworth Sleep Scale     | 0.59 (0.66)              | 2.67 (0.70)            | -2.09             | ( | -3.97 - -0.21           | ) | 0.029    |
| <b>Cognitive function</b>     |                          |                        |                   |   |                         |   |          |
| Cx in scores of MMSE          | 0.03 (0.30)              | -0.35 (0.31)           | 0.38              | ( | -0.46 - 1.21            | ) | 0.384    |
| Cx in WMS-1 (auditory memory) | 14.7 (2.11)              | 8.85 (1.77)            | 5.85              | ( | 0.46 - 11.25            | ) | 0.034    |
| Cx in WMS-2 (visual memory)   | 4.57 (1.04)              | 4.10 (1.08)            | 0.47              | ( | -2.46 - 3.39            | ) | 0.755    |
| Cx in WMS-4 (attention)       | 2.09 (1.37)              | 3.38 (1.52)            | -1.28             | ( | -5.28 - 2.72            | ) | 0.529    |
| Cx in FAB                     | 0.03 (0.34)              | 0.87 (0.35)            | -0.85             | ( | -1.81 - 0.11            | ) | 0.083    |

\*Effect size was estimated using GEE (working matrix M-dependent)

Cx: changes, SEM: standard error of mean

Higher scores in PPQ, and Epworth Sleep Scale are worse.

Higher scores in MMSE, WMS, and FAB are better.
