# Supplementary material for: Early use of donepezil against psychosis and cognitive decline in Parkinson’s disease: a randomised controlled trial for 2 years
Source: PubMed Central journal article supplement — J Neurol Neurosurg Psychiatry. 2018 Aug 3;89(12):1332–40. doi: 10.1136/jnnp-2018-318107 (PMC6288700; doi:10.1136/jnnp-2018-318107), 2018-08-03
Supplement: jnnp-2018-318107supp003.pdf [file jnnp-2018-318107supp003.pdf]

Supplementary table 3

**Secondary outcome measures in females**

|                               | Donepezil<br>means (SEM) | Placebo<br>means (SEM) | Treatment effect* |   |                         |   | <i>p</i> |
|-------------------------------|--------------------------|------------------------|-------------------|---|-------------------------|---|----------|
|                               |                          |                        | means             | ( | 95% confidence interval | ) |          |
| <b>Psychosis</b>              |                          |                        |                   |   |                         |   |          |
| Cx in total PPQ               | -0.04 (0.10)             | 0.40 (0.149)           | -0.44             | ( | -0.792 - -0.091         | ) | 0.014    |
| <b>Sleepiness</b>             |                          |                        |                   |   |                         |   |          |
| Cx in Epworth Sleep Scale     | 0.22 (0.61)              | 0.90 (0.60)            | -0.68             | ( | -2.34 - 0.97            | ) | 0.419    |
| <b>Cognitive function</b>     |                          |                        |                   |   |                         |   |          |
| Cx in scores of MMSE          | 0.01 (0.41)              | -1.19 (0.38)           | 1.20              | ( | 0.11 - 2.29             | ) | 0.031    |
| Cx in WMS-1 (auditory memory) | 8.96 (1.92)              | 5.62 (1.51)            | 3.33              | ( | -1.44 - 8.11            | ) | 0.170    |
| Cx in WMS-2 (visual memory)   | 3.32 (0.86)              | 2.57 (1.14)            | 0.74              | ( | -2.06 - 3.54            | ) | 0.603    |
| Cx in WMS-4 (attention)       | 0.26 (1.12)              | -1.41 (1.08)           | 1.67              | ( | -1.38 - 4.72            | ) | 0.282    |
| Cx in FAB                     | 0.08 (0.29)              | 0.04 (0.28)            | 0.05              | ( | -0.74 - 0.83            | ) | 0.910    |

\*Effect size was estimated using GEE (working matrix M-dependent)

Cx: changes, SEM: standard error of mean

Higher scores in PPQ, and Epworth Sleep Scale are worse.

Higher scores in MMSE, WMS, and FAB are better.
