# Supplementary material for: Early use of donepezil against psychosis and cognitive decline in Parkinson’s disease: a randomised controlled trial for 2 years
Source: PubMed Central journal article supplement — J Neurol Neurosurg Psychiatry. 2018 Aug 3;89(12):1332–40. doi: 10.1136/jnnp-2018-318107 (PMC6288700; doi:10.1136/jnnp-2018-318107), 2018-08-03
Supplement: jnnp-2018-318107supp004.pdf [file jnnp-2018-318107supp004.pdf]

Supplementary table 4

**Baseline characteristics of the subjects (subgroup by MMSE)**

|                                  | MMSE 27 or Lower |                | MMSE 28 or Higher |                |
|----------------------------------|------------------|----------------|-------------------|----------------|
|                                  | Donepezil (n=30) | Placebo (n=32) | Donepezil (n=42)  | Placebo (n=41) |
| Age, Yr, mean (SD)               | 69.0 ( 6.1 )     | 71.7 ( 5.1 )   | 65.9 ( 7.9 )      | 66.9 ( 7.5 )   |
| Female sex, n (%)                | 17 ( 56.7% )     | 17 ( 53.1% )   | 24 ( 57.1% )      | 22 ( 53.7% )   |
| PD duration, Yr, mean (SD)       | 8.5 ( 5.1 )      | 7.6 ( 3.9 )    | 8.0 ( 4.6 )       | 8.0 ( 4.6 )    |
| modified H-Y, n (%)              |                  |                |                   |                |
| 2.5                              | 15 ( 50.0% )     | 13 ( 40.6% )   | 21 ( 50.0% )      | 25 ( 61.0% )   |
| 3                                | 9 ( 30.0% )      | 14 ( 43.8% )   | 16 ( 38.1% )      | 15 ( 36.6% )   |
| 4                                | 6 ( 20.0% )      | 5 ( 15.6% )    | 5 ( 11.9% )       | 1 ( 2.4% )     |
| History of psychosis, n (%)      | 15 ( 50.0% )     | 8 ( 25.0% )    | 10 ( 23.8% )      | 16 ( 39.0% )   |
| ESS, mean (SD)                   | 8.1 ( 4.5 )      | 6.6 ( 5.1 )    | 6.2 ( 5.3 )       | 6.9 ( 5.5 )    |
| UPDRS, mean (SD)                 |                  |                |                   |                |
| Part I                           | 1.3 ( 1.0 )      | .7 ( .9 )      | .5 ( .8 )         | .6 ( .9 )      |
| Part II ON                       | 8.2 ( 5.1 )      | 6.0 ( 5.3 )    | 5.4 ( 5.0 )       | 6.4 ( 4.5 )    |
| Part II OFF *                    | 14.5 ( 7.0 )     | 12.1 ( 7.0 )   | 13.3 ( 7.2 )      | 12.3 ( 7.0 )   |
| Part III                         | 23.3 ( 10.3 )    | 21.9 ( 9.1 )   | 20.1 ( 11.4 )     | 21.5 ( 8.9 )   |
| Part IV                          | 3.4 ( 2.8 )      | 2.6 ( 2.7 )    | 3.1 ( 2.4 )       | 2.7 ( 2.0 )    |
| WMS, mean (SD) **                |                  |                |                   |                |
| auditory                         | 43.9 ( 17.0 )    | 34.2 ( 14.2 )  | 54.0 ( 19.1 )     | 53.2 ( 18.5 )  |
| visual                           | 43.2 ( 11.1 )    | 40.0 ( 13.2 )  | 52.7 ( 8.7 )      | 50.8 ( 8.5 )   |
| attention                        | 53.1 ( 11.9 )    | 52.4 ( 8.3 )   | 60.0 ( 10.7 )     | 59.2 ( 7.5 )   |
| delayed recall                   | 50.3 ( 19.9 )    | 38.6 ( 20.8 )  | 65.1 ( 16.3 )     | 64.3 ( 17.3 )  |
| FAB, mean (SD)***                | 13.7 ( 2.5 )     | 12.9 ( 2.0 )   | 15.2 ( 2.2 )      | 14.5 ( 2.0 )   |
| Dopaminergic agonist user, n (%) | 19 ( 63.3% )     | 18 ( 56.3% )   | 29 ( 69.0% )      | 34 ( 82.9% )   |
| amantadine user, n (%)           | 6 ( 20.0% )      | 5 ( 15.6% )    | 12 ( 28.6% )      | 10 ( 24.4% )   |
| Apolipoprotein E4, n (%) ***     | 11 ( 42.3% )     | 6 ( 22.2% )    | 10 ( 28.6% )      | 10 ( 27.0% )   |

\* n = 14 (MMSE < 28, donepezil), 17 (MMSE < 28, placebo), 27 (MMSE 28 or higher, donepezil), 22 (MMSE 28 or higher, placebo)

\*\* n = 28 (MMSE <28, donepezil), 31 (MMSE <28, placebo), 40 (MMSE 28 or higher, donepezil), 41 (MMSE 28 or higher, placebo)

\*\*\* n = 29 (MMSE <28, donepezil), 32 (MMSE <28, placebo), 41 (MMSE 28 or higher, donepezil), 41 (MMSE 28 or higher, placebo)

\*\*\* n = 26 (MMSE <28, donepezil), 27 (MMSE <28, placebo), 35 (MMSE 28 or higher, donepezil), 37 (MMSE 28 or higher, placebo)
