# Supplementary material for: Early use of donepezil against psychosis and cognitive decline in Parkinson’s disease: a randomised controlled trial for 2 years
Source: PubMed Central journal article supplement — J Neurol Neurosurg Psychiatry. 2018 Aug 3;89(12):1332–40. doi: 10.1136/jnnp-2018-318107 (PMC6288700; doi:10.1136/jnnp-2018-318107), 2018-08-03
Supplement: jnnp-2018-318107supp005.pdf [file jnnp-2018-318107supp005.pdf]

Supplementary table 5

**Changes in total PPQ in higher and lower MMSE subgroups**

|                 |                   | Donepezil       | Placebo        | Treatment effect |         |         |          |
|-----------------|-------------------|-----------------|----------------|------------------|---------|---------|----------|
|                 |                   | means ( SEM )   | means ( SEM )  | means (          | 95% CI  | )       | <i>p</i> |
| Cx in total PPQ | MMSE 27 or lower  | -0.17 ( 0.292 ) | 0.32 ( 0.262 ) | -0.49 (          | -1.26 - | 0.28 )  | 0.216    |
|                 | MMSE 28 or higher | -0.13 ( 0.127 ) | 0.68 ( 0.202 ) | -0.81 (          | -1.28 - | -0.34 ) | 0.001    |

Cx: changes
